# Supplementary material
Source: ML conference proceedings conference paper supplement (https://aclanthology.org/D18-1361)
Supplement: Attachment [file D18-1361.Attachment.zip]

| No. | Question                                                  | User's Answer |
|-----|-----------------------------------------------------------|---------------|
| 1   | Was the person born in Asia?                              | No            |
| 2   | Is the person very famous?                                | Yes           |
| 3   | Is the person a actor or actress?                         | No            |
| 4   | Is the person still alive?                                | Yes           |
| 5   | Was the person born in the 1990s?                         | No            |
| 6   | Is the person the founder of a famous company?            | No            |
| 7   | Did the person finish the college in USA?                 | No            |
| 8   | Is the person a famous singer?                            | No            |
| 9   | Is the person male?                                       | Yes           |
| 10  | Is the person related to sports?                          | Yes           |
| 11  | Is the person a football player?                          | Yes           |
| 12  | Is the person a midfielder?                               | No            |
| 13  | Is the person played for a European football club?        | Yes           |
| 14  | Is the person playing in the Spanish Premier League?      | Yes           |
| 15  | Is the person famous for the handsome or beautiful looks? | Yes           |
| 16  | Does the person have big muscles?                         | Yes           |
| 17  | Does the person have brown hair?                          | No            |
| 18  | Will you be happy when you see the person?                | Yes           |
| 19  | Does the person have brothers or sisters in the family?   | No            |
| 20  | Is the person engaged in many charity activities?         | Unknown       |

Table 1: The person that the user chooses is Cristiano Ronaldo, the famous football player. As we can see in table, the agent can still figure out the target person while No.17 and No.19 are answered wrong by the user, which indicates our agent is robust to noisy answers.

| No. | Question                                                  | User's Answer |
|-----|-----------------------------------------------------------|---------------|
| 1   | Is the person female?                                     | No            |
| 2   | Is the person still alive?                                | No            |
| 3   | Does the person have children?                            | Yes           |
| 4   | Does the person have brothers or sisters in the family?   | Yes           |
| 4   | Is the person very smart?                                 | Yes           |
| 5   | Was the person born in America?                           | No            |
| 6   | Is the person the white man?                              | Yes           |
| 7   | Is the person's family very rich?                         | No            |
| 8   | Is the person a controversial figure in history?          | Yes           |
| 9   | Is the person related to politics?                        | Yes           |
| 10  | Does the person have good looks?                          | Unknown       |
| 11  | Does the person have short hair?                          | Yes           |
| 12  | Is the person very famous?                                | Yes           |
| 13  | Has the person once been very powerful?                   | Yes           |
| 14  | Is the character of the person very aggressive?           | No            |
| 15  | Has the person been the president of a country?           | Yes           |
| 16  | Is the person a military?                                 | Yes           |
| 17  | Has the person once killed men?                           | No            |
| 18  | Was the person born in Britain?                           | No            |
| 19  | Was the person one of famous leaders in the World War II? | No            |
| 20  | Has the person once been the emperor?                     | Yes           |

Table 2: In this case, the person that the user chooses is Napoleon Bonaparte, the French Emperor. Although there are some other candidates satisfied the constraints, our agent can figure out the target person because of the people popularity.
